# Supplementary material
Source: publisher figshare collection journal article supplement (https://sage.figshare.com/ndownloader/files/14606081)
Supplement: Supplementary file 1 [file 14606081]

## Appendix

Table A1

### Description of Variables

|                                           | <b>Depended Variables</b>                                                                                                                                                                                                                                                    | <b>N</b> | <b>Mean</b> | <b>e(sd)</b> | <b>Min</b> | <b>Max</b> |
|-------------------------------------------|------------------------------------------------------------------------------------------------------------------------------------------------------------------------------------------------------------------------------------------------------------------------------|----------|-------------|--------------|------------|------------|
| Relative importance of work (RIW)         | Work should always come first even if it means less spare time. Answered on a scale 1-4: 1 = strongly disagree, 4 = strongly agree; Dichotomized to 0 =1-2, 1=2-3.                                                                                                           | 4470     | .47         | .50          | 0          | 1          |
| Non-financial employment commitment (NEC) | If you were to get enough money to live as comfortably as you would like for the rest of your life, would you continue to work or would you stop working? 0=Stop working, 1= Continue work.                                                                                  | 3812     | .77         | .42          | 0          | 1          |
| RIWc                                      | Predicted factor of PCA of: It's humiliating to receive money without having to work, Work is a duty towards society & Work should always come first even if it means less spare time. Answered on a scale 1-4: 1 = strongly disagree, 4 = strongly agree. Standardized 0-1. | 4447     | .55         | .21          | 0          | 1          |
| <b>Independent Variables</b>              |                                                                                                                                                                                                                                                                              |          |             |              |            |            |
| Parent RIW                                | Similar to RIW                                                                                                                                                                                                                                                               | 4483     | .62         | .49          | 0          | 1          |
| Parent NEC                                | Similar to NEC                                                                                                                                                                                                                                                               | 4161     | .66         | .48          | 0          | 1          |
| Male                                      | Sex of the respondents: 0 = male 1 = female                                                                                                                                                                                                                                  | 4483     | .44         | .50          | 0          | 1          |
| Highest Level of Education                | Highest completed level of education. 1= ISCED 2011 level 0-1; ...; 7 = ISCED 2011 level 7-8                                                                                                                                                                                 | 4483     | 4.63        | 1.73         | 1          | 7          |
| Children                                  | Number of children coded: 0=no children 1= 1 or more children                                                                                                                                                                                                                | 4483     | .20         | .40          | 0          | 1          |
| Migration background                      | 0=youth and parent born in country of question 1=born abroad or one parent born abroad                                                                                                                                                                                       | 4483     | .12         | .33          | 0          | 1          |
| ISCO-0 Skilled                            | Title of job coded using the ISCO-08 categories 2-digit codes 1 Managers 2 Professionals 3 Technicians                                                                                                                                                                       | 4483     | .26         | .44          | 0          | 1          |
| ISCO-0 Intermediate                       | Title of job coded using the ISCO-08 categories 2-digit codes 4 Clerical support workers 5 Service and sales workers 6 Skilled agricultural                                                                                                                                  | 4483     | .17         | .38          | 0          | 1          |
| ISCO-0 Semi and Nonskilled                | Title of job coded using the ISCO-08 categories 2-digit codes 7 Craft and Trades workers 8 Plant and machine operators 9 Elementary occupations                                                                                                                              | 4483     | .08         | .27          | 0          | 1          |
| Status Unemployed                         | Main activity in the last month: In Education/Training                                                                                                                                                                                                                       | 4483     | .12         | .32          | 0          | 1          |
| Status Educ./Training                     | Main activity in the last month: Unemployed                                                                                                                                                                                                                                  | 4483     | .27         | .45          | 0          | 1          |
| Status Other                              | Main activity in the last month: Other (Housework looking after children, parental                                                                                                                                                                                           | 4483     | .10         | .30          | 0          | 1          |

|                                                                        |                                                                                                                                                                      |      |       |       |      |      |
|------------------------------------------------------------------------|----------------------------------------------------------------------------------------------------------------------------------------------------------------------|------|-------|-------|------|------|
|                                                                        | leave, military service, unable to work because of health issues)                                                                                                    |      |       |       |      |      |
| Financial satisfaction                                                 | Thinking about your own financial situation, how satisfied are you right now? 1=Very dissatisfied, 4=Very satisfied                                                  | 4483 | 2.39  | .82   | 1    | 4    |
| <b>Macro Variables</b>                                                 |                                                                                                                                                                      |      |       |       |      |      |
| Percentage of employees in low human capital intensive sectors, NUTS-2 | Not technology and knowledge-intensive sectors (1-(C_LTC+D_FLKIS)) by NUTS 2 regions and sex , NACE Rev. 2, 2015 Source: Eurostat htec_emp_reg2                      | 131  | 46.67 | 5.18  | 30.7 | 66.0 |
| Youth unemployment rate, NUTS2                                         | Youth unemployment rate (15-24) by NUTS 2 region, 2015 Source: Eurostat edat_ifse_22                                                                                 | 131  | 28.18 | 17.61 | 3.4  | 65.1 |
| Long term unemployment rate, NUTS2                                     | Long term unemployment rate by NUTS 2 region 2015 Defined as unemployed for longer than 1 year in percent of active population 15-74 Source: Eurostat lfst_r_lfu2ltu | 131  | 6.81  | 5.97  | .6   | 21.7 |
| Female labor force participation rate 25-34, NUTS2                     | Female economic activity rate 25-34 by NUTS2 region, 2015 Source: Eurostat lfst_r_lfp2actrt                                                                          | 131  | 76.68 | 9.32  | 42.5 | 88.1 |

---

Table A2

RIW and NEC

| RIW   | NEC   |        | Total  |
|-------|-------|--------|--------|
|       | Low   | High   |        |
| Low   | 1,852 | 5,254  | 7,107  |
| High  | 1,207 | 5,315  | 6,522  |
| Total | 3,060 | 10,569 | 13,629 |

Pearson Chi2 = 111.83 (p &lt; 0.00)

Gamma 0.22, ADE = 0.02

Table A3

Principal component analysis of work centrality and non-financial work commitment

WVb\_hum<sup>1</sup> It's humiliating to receive money without having to work.WVd\_dut<sup>1</sup> Work is a duty towards society.WVe\_fir<sup>1</sup> Work should always come first even if it means less spare time.<sup>1</sup>Answered on a scale 1-4: 1 = strongly disagree, 4 = strongly agree.

ContWork Would continue to work having enough money to live comfortably for the rest of your life

Orthogonal varimax rotation

| Component | Variance | Difference | Proportion | Cumulative |
|-----------|----------|------------|------------|------------|
| Comp1     | 1.54     | 0.54       | 0.39       | 0.39       |
| Comp2     | 1.00     | -          | 0.25       | 0.64       |

N=13,574

| Variable | Comp1 | Comp2 | Unexplained |
|----------|-------|-------|-------------|
| WVb_hum  | 0.53  | 0.07  | 0.55        |
| WVd_dut  | 0.59  | 0.01  | 0.45        |
| WVe_fir  | 0.61  | -0.06 | 0.44        |
| ContWork | 0.00  | 0.99  | 0.00        |

Table A4: Difference between youth sample with and without parent data of RIW

| Country        | Work First | N     | Work Value<br>if parent data available | N     | Chi2    | Cramer's V |
|----------------|------------|-------|----------------------------------------|-------|---------|------------|
| Austria        | 0.39       | 1,684 | 0.40                                   | 517   |         |            |
| Germany        | 0.45       | 3,279 | 0.52                                   | 480   |         |            |
| Denmark        | 0.46       | 1,142 | 0.45                                   | 403   | 8.97*** | 0.05       |
| UK             | 0.51       | 3,004 | 0.54                                   | 499   |         |            |
| Czech Republic | 0.31       | 1,214 | 0.31                                   | 613   |         |            |
| Hungary        | 0.58       | 1,254 | 0.60                                   | 574   |         |            |
| Italy          | 0.66       | 1,008 | 0.70                                   | 529   | 8.58*** | 0.09       |
| Spain          | 0.42       | 1,826 | 0,38                                   | 1,004 | 20.0*** | -0.10      |
| Greece         | 0.50       | 1,538 | 0,53                                   | 500   |         |            |

Table A5: Difference between youth sample with and without parent data of NEC

| Country        | Continue Work | N     | Continue Work<br>if parent data available | N   | Chi2    | Cramer's V |
|----------------|---------------|-------|-------------------------------------------|-----|---------|------------|
| Austria        | 0.84          | 1,453 | 0.80                                      | 442 | 7.63*** | -0.07      |
| Germany        | 0.79          | 2,912 | 0.82                                      | 429 | 2.97*   | 0.03       |
| Denmark        | 0.84          | 997   | 0.85                                      | 354 |         |            |
| UK             | 0.72          | 2,472 | 0.69                                      | 387 |         |            |
| Czech Republic | 0.86          | 980   | 0.85                                      | 499 |         |            |
| Hungary        | 0.63          | 1,123 | 0.65                                      | 521 |         |            |
| Italy          | 0.78          | 824   | 0.77                                      | 431 |         |            |
| Spain          | 0.74          | 1,552 | 0.73                                      | 846 |         |            |
| Greece         | 0.84          | 1,345 | 0.84                                      | 448 |         |            |

Table A6: Gender separate estimates from two-level random intercept logit models of RIW and NEC

| VARIABLES                                                              | (1)<br>Female<br>RIW    | (3)<br>Male<br>RIW      | (5)<br>Female<br>NEC    | (7)<br>Male<br>NEC |
|------------------------------------------------------------------------|-------------------------|-------------------------|-------------------------|--------------------|
| Parent RIW                                                             | 0.83***<br>(0.091)      | 1.07***<br>(0.11)       |                         |                    |
| Parent NEC                                                             |                         |                         | 1.20***<br>(0.12)       | 1.32***<br>(0.12)  |
| Percentage of employees in low human capital intensive sectors, NUTS-2 | 0.0041<br>(0.015)       | -0.019<br>(0.018)       | -0.030<br>(0.022)       | 0.0060<br>(0.019)  |
| Youth unemployment rate 18-24, NUTS2                                   | -0.0030<br>(0.018)      | -0.0054<br>(0.021)      | -0.052<br>(0.025)       | -0.0095<br>(0.021) |
| Long term unemployment rate, NUTS2                                     | -0.0071<br>(0.045)      | -0.013<br>(0.054)       | -0.10<br>(0.063)        | -0.046<br>(0.055)  |
| Female labor force participation rate 25-34, NUTS2                     | -<br>0.030**<br>(0.014) | -0.027<br>(0.017)       | -<br>0.050**<br>(0.019) | -0.0046<br>(0.017) |
| Highest Level of Education                                             | -<br>0.066**<br>(0.029) | -<br>0.16***<br>(0.033) | 0.12***<br>(0.040)      | 0.12***<br>(0.039) |
| Children (Ref. No Children)                                            | -0.035<br>(0.12)        | -0.078<br>(0.15)        | 0.094<br>(0.16)         | -0.27<br>(0.17)    |
| Migration background (Ref. No Migration back.)                         | 0.28**<br>(0.13)        | 0.11<br>(0.16)          | 0.50**<br>(0.20)        | -0.012<br>(0.19)   |
| Financial satisfaction                                                 | 0.056<br>(0.059)        | 0.13*<br>(0.068)        | -0.076<br>(0.082)       | 0.13<br>(0.082)    |
| Employment Status: (Ref. High skilled employed)                        |                         |                         |                         |                    |
| Intermediate                                                           | 0.041<br>(0.14)         | 0.15<br>(0.16)          | -0.31<br>(0.19)         | -0.24<br>(0.20)    |
| Semi and Nonskilled                                                    | 0.082<br>(0.26)         | 0.045<br>(0.19)         | -0.13<br>(0.34)         | -0.17<br>(0.22)    |
| Unemployed                                                             | 0.29*<br>(0.17)         | -0.054<br>(0.20)        | -0.52**<br>(0.23)       | 0.073<br>(0.24)    |
| Educ./Training                                                         | -0.11<br>(0.13)         | -0.33**<br>(0.14)       | -0.022<br>(0.20)        | -0.17<br>(0.18)    |
| Other                                                                  | -0.11<br>(0.16)         | -0.023<br>(0.25)        | -<br>0.69***<br>(0.22)  | -0.38<br>(0.31)    |
| Constant                                                               | 1.20<br>(1.49)          | 2.47<br>(1.84)          | 6.06***<br>(2.07)       | -0.63<br>(1.81)    |
| Observations                                                           | 2,493                   | 1,963                   | 1,959                   | 1,614              |
| Number of groups                                                       | 132                     | 130                     | 129                     | 130                |

Standard errors in parentheses \*\*\* p&lt;0.01, \*\* p&lt;0.05, \* p&lt;0.1, Country fixed effects included (not shown).

Table A7: Estimates from two-level random intercept logit models of RIW using a continues factor variable from a pca of WVb\_hum WVd\_dut WVe\_fir

| VARIABLES                                                                 | (1)<br>RIWc             |
|---------------------------------------------------------------------------|-------------------------|
| Parent RIW, binary                                                        | 0.075***<br>(0.0063)    |
| Percentage of employees in low human capital intensive sectors,<br>NUTS-2 | -0.0014<br><br>(0.0010) |
| Youth unemployment rate 18-24, NUTS2                                      | 0.0017<br>(0.0012)      |
| Long term unemployment rate, NUTS2                                        | -0.0031<br>(0.0030)     |
| Female labor force participation rate 25-34, NUTS2                        | -0.0013<br>(0.00091)    |
| Male (Ref. Female)                                                        | 0.0038<br>(0.0062)      |
| Highest Level of Education                                                | -0.0076***<br>(0.0019)  |
| Children (Ref. No Children)                                               | -0.0075<br>(0.0081)     |
| Migration background (Ref. No Migration back.)                            | 0.011<br>(0.0092)       |
| Financial satisfaction                                                    | 0.012***<br>(0.0041)    |
| Employment Status: (Ref. High skilled employed)                           |                         |
| Intermediate                                                              | 0.0063<br>(0.0097)      |
| Semi and Nonskilled                                                       | 0.012<br>(0.013)        |
| Unemployed                                                                | -0.012<br>(0.012)       |
| Educ./Training                                                            | -0.010<br>(0.0089)      |
| Other                                                                     | -0.023*<br>(0.012)      |
| Constant                                                                  | 0.61***<br>(0.099)      |
| Observations                                                              | 4,433                   |
| Number of groups                                                          | 132                     |

Standard errors in parentheses \*\*\* p<0.01, \*\* p<0.05, \* p<0.1 Country fixed effects included (not shown).

Table A8: Level 2 estimates of two level random intercept logit models of RIW using a continues factor variable from a pca of WVb\_hum WVD\_dut WVe\_fir

|                                                                | (1)<br>RIWc | (2)<br>RIWc         | (3)<br>RIWc           | (4)<br>RIWc        | (5)<br>RIWc            | (6)<br>RIWc          |
|----------------------------------------------------------------|-------------|---------------------|-----------------------|--------------------|------------------------|----------------------|
| Percentage of employees in low human capital intensive sectors |             | -0.0013<br>(0.0011) |                       |                    |                        | -0.0014<br>(0.00100) |
| Youth unemployment rate                                        |             |                     | 0.0015**<br>(0.00063) |                    |                        | 0.0017<br>(0.0012)   |
| Long term unemployment rate                                    |             |                     |                       | 0.0025<br>(0.0017) |                        | -0.0031<br>(0.0030)  |
| Female labor force participation rate 25-34                    |             |                     |                       |                    | -0.0016**<br>(0.00067) | -0.0013<br>(0.00091) |
| ICC                                                            | 0.009       | 0.008               | 0.006                 | 0.008              | 0.006                  | 0.003                |
| Level 2 var.                                                   | 0.00034     | 0.00031             | 0.00025               | 0.00033            | 0.00025                | 0.00013              |
| PRV, %                                                         | -           | 8.8                 | 26.5                  | 2,9                | 26.5                   | 61,8                 |

PRV: Proportional reduction in variance component compared to model 1

N=4,433, Number of level 2 groups= 132, The models include all level 1 controls used in Table 1 and country level dummies
